# Supplementary material for: Fluorescent indicator displacement assay for the discovery of UGGAA repeat-targeted small molecules
Source: Royal Society of Chemistry journal article supplement (doi:10.1039/d3cc00837a), 2023-01-01

## Supplementary Information

### Fluorescent indicator displacement assay for discovery of UGGAA repeat-targeted small molecules

Tomonori Shibata,<sup>\*a</sup> Yasumasa Matsumoto,<sup>b</sup> Akiko Iihara,<sup>b</sup> Kazunori Yamada,<sup>b</sup> Hiroshi Ochiai,<sup>b</sup> Ryo Saito,<sup>b</sup> Shinichi Kusaka,<sup>b</sup> and Toshiyuki Kume,<sup>b</sup>

<sup>a</sup> Department of Regulatory Bioorganic Chemistry, *SANKEN (The Institute of Scientific and Industrial Research)*, Osaka University, 8-1 Mihogaoka, Ibaraki 567-0047, Japan

<sup>b</sup> Sohyaku. Innovative Research Division, Mitsubishi Tanabe Pharma Corporation, 1-1-1, Marunouchi, Chiyoda-ku, Tokyo 100-8205, Japan

#### Contents

|                                                                                                     |       |
|-----------------------------------------------------------------------------------------------------|-------|
| <b>Experimental section</b>                                                                         | p. 2  |
| <b>Scheme S1.</b> Synthesis of NBD-NCD.                                                             | p. 4  |
| <b>Figure S1.</b> CSI-TOF-MS spectrum of r(UGGAA) <sub>5</sub> in the presence of NBD-NCD.          | p. 5  |
| <b>Table S1.</b> <i>m/z</i> values of the complexes of r(UGGAA) <sub>5</sub> with NBD-NCD           | p. 5  |
| <b>Figure S2.</b> Titration of r(UGGAA) <sub>9</sub> to X2S and TO-PRO-1                            | p. 6  |
| <b>Figure S3.</b> Titration of r(UAGAA) <sub>9</sub> and r(UAAAA) <sub>9</sub> to NBD-NCD           | p. 6  |
| <b>Figure S4.</b> Chemical structures of LC-1~LC-20 and QCD                                         | p. 7  |
| <b>Figure S5.</b> FP of NBD-NCD with r(UGGAA) <sub>9</sub> in the presence of hit compounds         | p. 8  |
| <b>Figure S6.</b> FID assay with the addition of LC-14                                              | p. 8  |
| <b>Figure S7.</b> UV melting curves of r(UGGAA) <sub>9</sub> in the presence of LC-14               | p. 9  |
| <b>Figure S8.</b> SPR analysis of the binding of non-hit compounds to r(UGGAA) <sub>9</sub>         | p. 9  |
| <b>Figure S9.</b> Relative FI of NBD-NCD in the presence of CM-D1 or CM-D2.                         | p. 10 |
| <b>Figure S10.</b> FID assay with the addition of CM-D1                                             | p. 10 |
| <b>Figure S11.</b> UV melting curves of r(UGGAA) <sub>9</sub> in the presence of SMN-C5 derivatives | p. 11 |
| <b>Figure S12.</b> SPR analysis of the binding of SMN-C5 derivatives to r(UGGAA) <sub>9</sub> .     | p. 12 |
| <sup>1</sup> H NMR spectra of NBD-NCD                                                               | p. 13 |
| <sup>13</sup> C NMR spectra of NBD-NCD                                                              | p. 14 |

## Experimental section

**$T_m$  measurements:** Thermal denaturation profiles were recorded on a UV-2700 spectrophotometer (Shimadzu) equipped with a TMSPC-8 temperature controller and a 10 mm path-length cell. The absorbance of r(UGGAA)<sub>9</sub> (2  $\mu$ M) without and with ligand (20 or 40  $\mu$ M) in sodium phosphate buffer (10 mM, pH 7.0) containing NaCl (100 mM) was monitored at 260 nm from 2 to 100 °C (1 °C min<sup>-1</sup>).  $T_m$  was calculated by using the median method.

**ESI-TOF-MS measurements:** Samples were prepared by mixing r(UGGAA)<sub>5</sub> (10  $\mu$ M) and NBD-NCD (50 or 100  $\mu$ M) in 50% methanol in water containing 100 mM ammonium acetate. Mass spectra were obtained with JEOL JMS-T100LP AccuTOF LC-plus 4G mass spectrometer in negative mode. The spray temperature was fixed at -10 °C with a sample flow rate of 20  $\mu$ L min<sup>-1</sup>.

**CD measurements:** CD experiments were carried out on a J-725 CD spectrometer (JASCO) using a 10 mm path-length cell. CD spectra of 2  $\mu$ M r(UGGAA)<sub>9</sub> in the absence and presence of NBD-NCD (20  $\mu$ M) were measured in sodium phosphate buffer (10 mM, pH 7.0) containing NaCl (100 mM).

**RNA titration experiments:** RNA titration experiments were performed with a mixture of r(UGGAA)<sub>n</sub> (50, 100, 200, 400 nM) and NBD-NCD (1  $\mu$ M) in sodium phosphate buffer (10 mM, pH 7.0) containing 1% DMSO, 0.1% Triton-X, and NaCl (100 mM) at room temperature. The fluorescence intensity (FI) and fluorescence polarization (FP) were measured with 490 nm excitation and 540 nm emission using a microplate reader (Spark). The normalized FI was calculated by normalization with the FI of only NBD.

**FID assay:** The FID assay was performed with a mixture of r(UGGAA)<sub>9</sub> (200 nM), NBD-NCD (1  $\mu$ M), and ligand (10  $\mu$ M) in sodium phosphate buffer (10 mM, pH 7.0) containing 1% DMSO, 0.1% Triton-X, and NaCl (100 mM) at room temperature using a microplate reader (Spark). In ligand titration experiments, ligand concentration was 1–20  $\mu$ M. The FI of each well containing sample (100  $\mu$ L for 96-well plate or 20  $\mu$ L for 384-well plate) was measured with 490 nm excitation and 540 nm emission. In the FID assay for SMN-C5, risdiplam, CM-D1, and CM-D2, the fluorescence readings were taken with 510 nm excitation and 560 nm emission. The fold

change in FI was calculated by normalization with the FI of NBD-NCD with r(UGGAA)<sub>9</sub>. In Fig. 4c, the FI of NBD-NCD with r(UGGAA)<sub>9</sub> and ligand was subtracted from the FI of only ligand and then was normalized with FI of NBD-NCD with r(UGGAA)<sub>9</sub>.

### Surface plasmon resonance (SPR) assay

5'-biotin-TEG r(UGGAA)<sub>9</sub> was immobilized on the SA sensor chip (BIAcore) that coated the surface with streptavidin. The surface of sensor chip SA was washed with 50 mM NaOH and 1 M NaCl at three times for 60 s with the flow rate of 30  $\mu$ l min<sup>-1</sup>. 5'-biotin-TEG r(UGGAA)<sub>9</sub> was immobilized to the surface under the following conditions: 200 nM repeat RNA in 10 mM HEPES (pH 7.4), 500 mM NaCl. Amount of r(UGGAA)<sub>9</sub> immobilized on the chip surface was 476 response units (RU). SPR analysis for the binding of non-hit compounds to the r(UGGAA)<sub>9</sub>-immobilized surface was performed using a BIAcore T200 SPR system (GE Healthcare) under the following condition: 10  $\mu$ M compounds in HBS-EP+ buffer (GE Healthcare) containing 5% DMSO. The binding of SMN-C5, risdiplam, CM-D1, and CM-D2 were analyzed in single-cycle mode. These ligands were sequentially injected at concentrations of 1.25, 2.5, 5, 10, and 20  $\mu$ M.

### Synthesis of NBD-NCD

A mixture of NCD-linker<sup>1,2</sup> (20 mg, 31  $\mu$ mol), NBD-COOH (15 mg, 50  $\mu$ mol), 1-ethyl-3-(3-dimethylaminopropyl)carbodiimide hydrochloride (10 mg, 50  $\mu$ mol), and 1-hydroxybenzotriazole (8 mg, 50  $\mu$ mol) in DMF (2 mL) was stirred overnight at room temperature. The solvent was removed *in vacuo*. The resulting mixture was dissolved in chloroform and washed with sat. NaHCO<sub>3</sub> aq. and brine. The organic layer was dried over MgSO<sub>4</sub> and evaporated to dryness. The crude product was purified by silica gel chromatography to give NBD-NCD (13 mg, 46%). <sup>1</sup>H NMR (CD<sub>3</sub>OD, 600 MHz)  $\delta$  8.36 (d, 1 H, *J* = 7.8 Hz), 8.13–8.08 (m, 4 H), 8.04 (d, 2 H, *J* = 7.8 Hz), 7.27 (d, 2 H, *J* = 8.4 Hz), 6.18 (d, 1 H, *J* = 8.4 Hz), 4.27 (t, 4 H, *J* = 6.6 Hz), 3.42 (br, 2 H), 3.23 (t, 2 H, *J* = 6.6 Hz), 3.16 (t, 2 H, *J* = 7.2 Hz), 2.66 (s, 6H), 2.62 (t, 4 H, *J* = 7.2 Hz), 2.52 (t, 2 H, *J* = 7.2 Hz), 2.21–2.17 (m, 4 H), 1.91 (quin, 4 H, *J* = 6.6 Hz), 1.78–1.69 (m, 6H), 1.66 (quin, 2 H, *J* = 7.2 Hz), 1.42 (quin, 2 H, *J* = 7.2 Hz); <sup>13</sup>C NMR (CD<sub>3</sub>OD, 150 MHz)  $\delta$  176.0, 175.4, 163.9, 155.8, 155.4, 155.3, 146.4, 145.7, 145.4, 140.0, 138.6, 138.4, 122.8, 122.3, 119.2, 114.2, 99.5, 64.9, 52.7, 51.3, 44.5, 39.9, 38.9, 36.9, 34.5, 28.9, 27.8, 27.6, 27.5, 26.9, 26.5, 25.0

HRMS (ESI) *m/z*: calcd. for [C<sub>49</sub>H<sub>55</sub>N<sub>13</sub>O<sub>9</sub>+H]<sup>+</sup> 922.4318; found 922.4320.

## Reference

1. Nakatani, K., He, H., Uno, S, Yamamoto T., and Dohno, C. *Current Protocols in Nucleic Acid Chemistry.*, 2008, Unit 8.6.1–8.6.21.
2. Takashima, Y., Murata, A., Iida, K., Sugai, A., Hagiwara, M., Nakatani, K. *ACS Chem. Biol.*, 2022, **17**, 2817–2827.

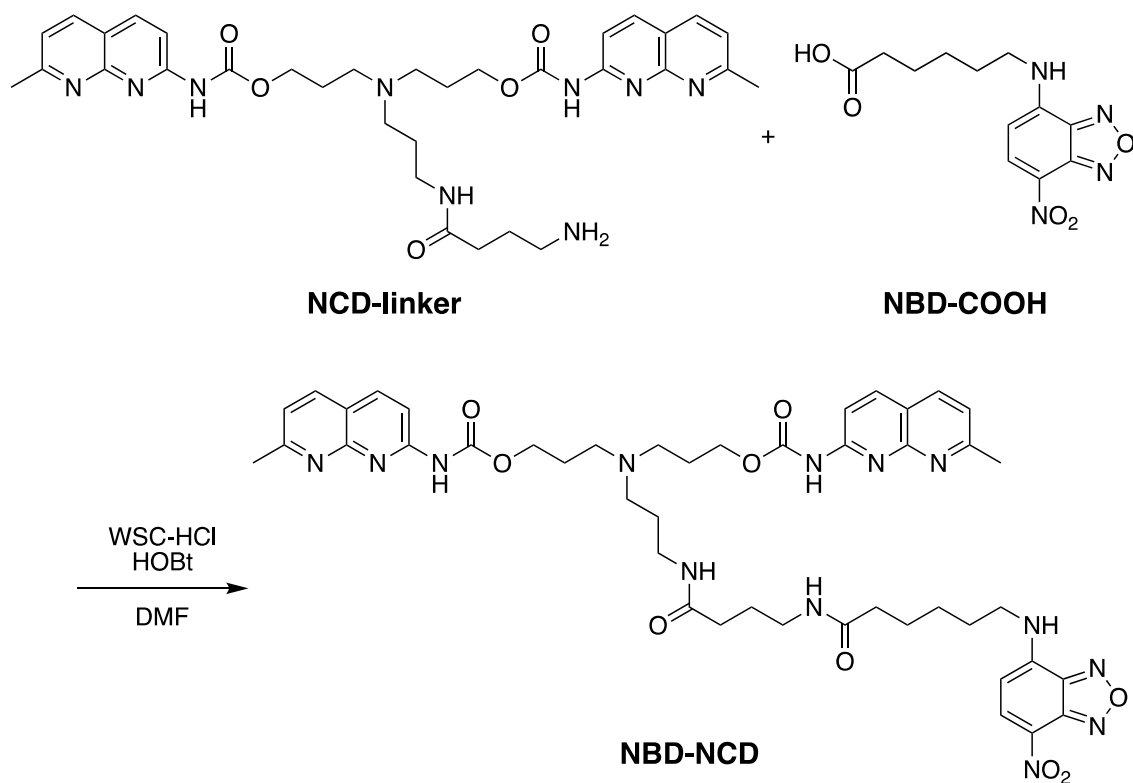

**Scheme S1.** Synthesis of NBD-NCD

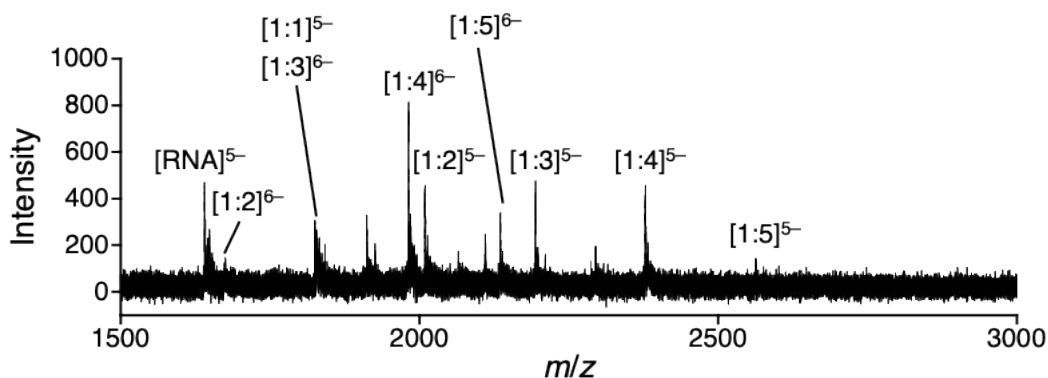

**Figure S1.** CSI-TOF-MS spectrum of 10  $\mu\text{M}$  r(UGGAA)<sub>5</sub> in the presence of 50  $\mu\text{M}$  NBD-NCD.

**Table S1.**  $m/z$  values of the complexes of r(UGGAA)<sub>5</sub> with NBD-NCD<sup>a</sup>

| Ion species                                         | $m/z$ calc. | $m/z$ found |
|-----------------------------------------------------|-------------|-------------|
| [RNA] <sup>4-</sup>                                 | 2051.28     | 2051.24     |
| [RNA] <sup>5-</sup>                                 | 1640.82     | 1640.85     |
| [RNA-NBD-NCD] <sup>5-</sup> ([1:1] <sup>5-</sup> )  | 1825.11     | 1825.14     |
| [RNA-2NBD-NCD] <sup>5-</sup> ([1:2] <sup>5-</sup> ) | 2009.39     | 2009.41     |
| [RNA-2NBD-NCD] <sup>6-</sup> ([1:2] <sup>6-</sup> ) | 1674.33     | 1674.35     |
| [RNA-3NBD-NCD] <sup>5-</sup> ([1:3] <sup>5-</sup> ) | 2193.68     | 2193.76     |
| [RNA-3NBD-NCD] <sup>6-</sup> ([1:3] <sup>6-</sup> ) | 1827.90     | 1828.03     |
| [RNA-4NBD-NCD] <sup>5-</sup> ([1:4] <sup>5-</sup> ) | 2377.96     | 2378.30     |
| [RNA-4NBD-NCD] <sup>6-</sup> ([1:4] <sup>6-</sup> ) | 1981.47     | 1981.47     |
| [RNA-5NBD-NCD] <sup>5-</sup> ([1:5] <sup>5-</sup> ) | 2562.25     | 2562.62     |
| [RNA-5NBD-NCD] <sup>6-</sup> ([1:5] <sup>6-</sup> ) | 2135.04     | 2135.44     |

<sup>a</sup>  $m/z$  values were observed in CSI-TOF-MS spectra of 10  $\mu\text{M}$  r(UGGAA)<sub>5</sub> in the absence and presence of 50–100  $\mu\text{M}$  NBD-NCD.

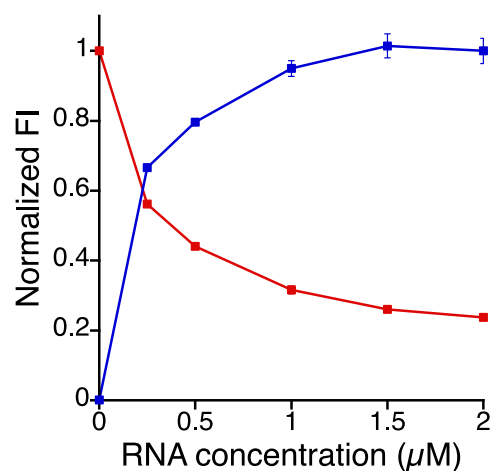

**Figure S2.** Plots of RNA concentration versus normalized FI of X2S (red) and TO-PRO-1 (blue) in the presence of r(UGGAA)<sub>9</sub> at concentrations of 0.25, 0.5, 1, 1.5, and 2 μM. The concentration of fluorescence indicators was 1 μM. The FI of X2S in the presence of RNA was normalized with that of only X2S. The FI of TO-PRO-1 was normalized with that in the presence of 2 μM RNA.

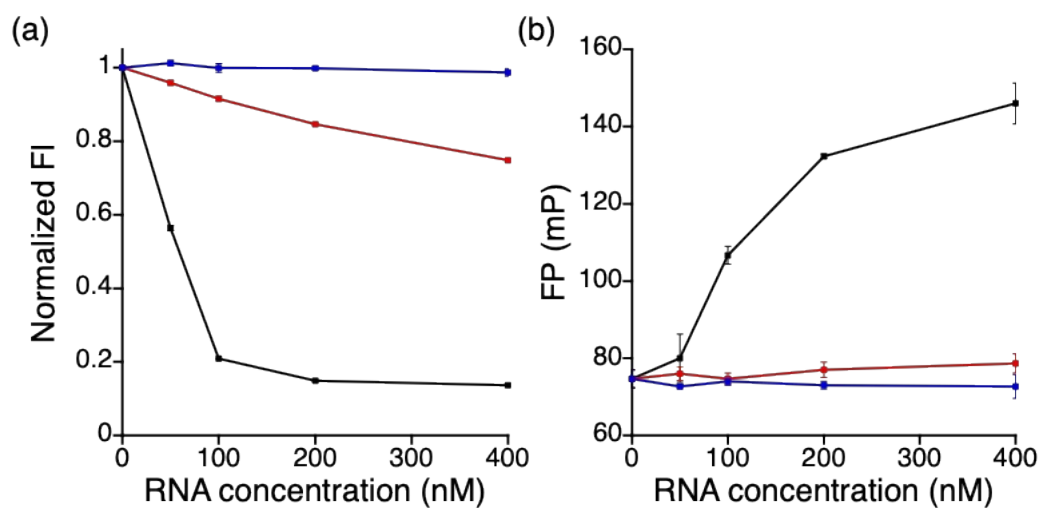

**Figure S3.** Plots of RNA concentration versus (a) normalized FI and (b) FP of 1 μM NBD-NCD in the presence of r(UGGAA)<sub>9</sub> (black), r(UAGAA)<sub>9</sub> (red), and r(UAAAA)<sub>9</sub> (blue) at concentrations of 50, 100, 200, and 400 nM.

|                                                                                                                        |                                                                                                  |                                                                                                   |                                                                                                       |
|------------------------------------------------------------------------------------------------------------------------|--------------------------------------------------------------------------------------------------|---------------------------------------------------------------------------------------------------|-------------------------------------------------------------------------------------------------------|
| 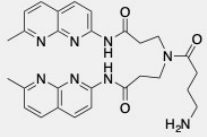 <p>LC-1</p>                          | 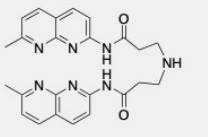 <p>LC-2</p>    | 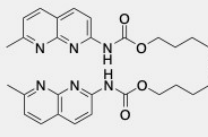 <p>LC-3</p>    | 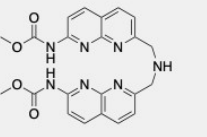 <p>LC-4</p>       |
| 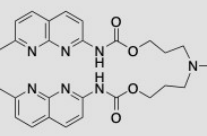 <p>LC-5</p>                          | 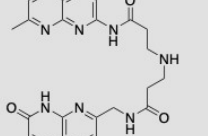 <p>LC-6</p>    | 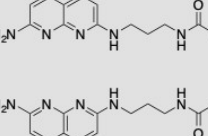 <p>LC-7</p>    | 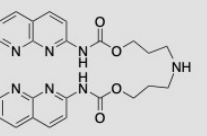 <p>LC-9 (NCD)</p> |
| 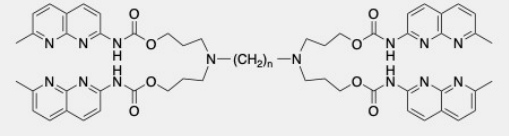 <p>LC-8: n = 8<br/>LC-11: n = 6</p> |                                                                                                  | 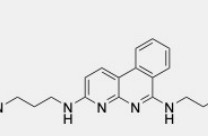 <p>LC-10</p>  | 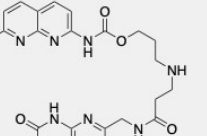 <p>LC-12</p>     |
| 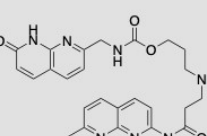 <p>LC-13</p>                       | 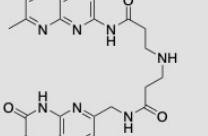 <p>LC-14</p> | 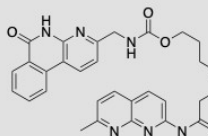 <p>LC-15</p> | 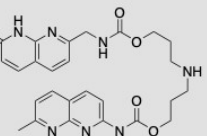 <p>LC-16</p>    |
| 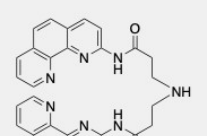 <p>LC-17</p>                       | 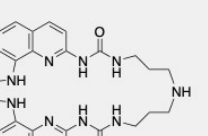 <p>LC-18</p> | 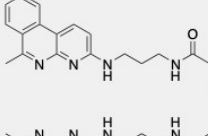 <p>LC-19</p> | 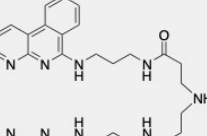 <p>LC-20</p>    |

**Figure S4.** Chemical structures of LC-1~LC-20.

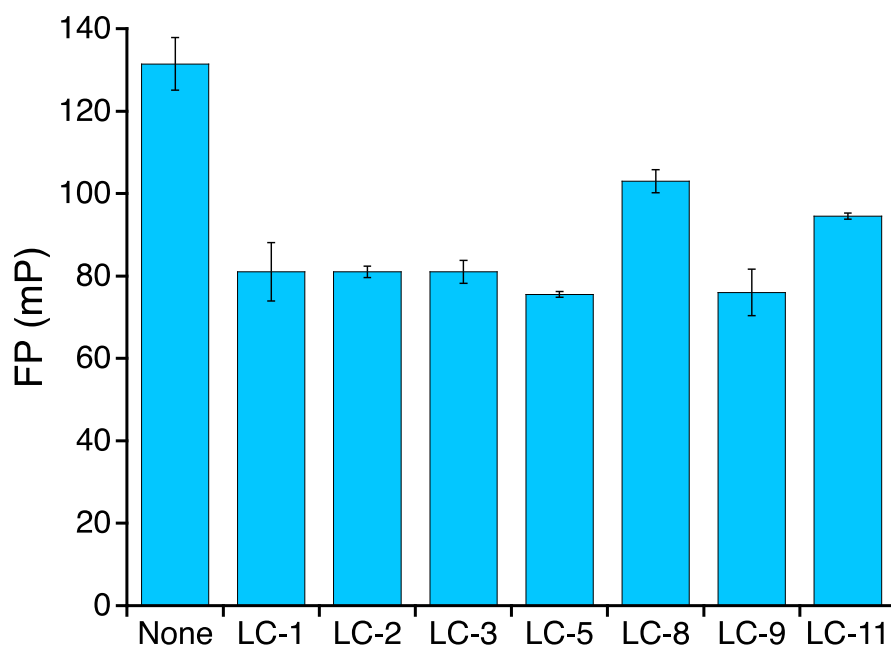

**Figure S5.** Fluorescence polarization of 1  $\mu\text{M}$  NBD-NCD with 200 nM r(UGGAA)<sub>9</sub> in the absence and presence of 10  $\mu\text{M}$  LC-1, LC-2, LC-3, LC-5, LC-8, LC-9, and LC-11.

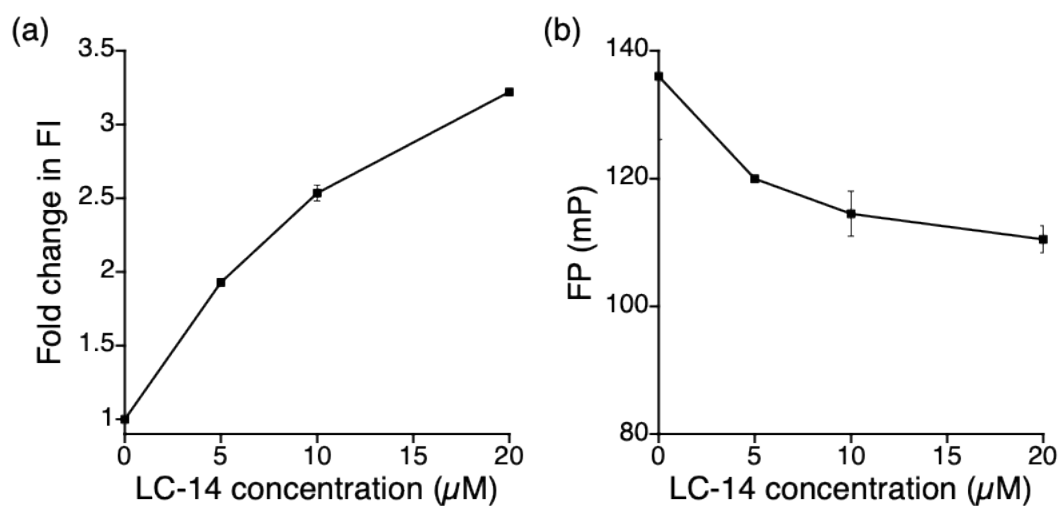

**Figure S6.** Plots of LC-14 concentration versus (a) fold change in FI and (b) FP of 1  $\mu\text{M}$  NBD-NCD with 200 nM r(UGGAA)<sub>9</sub> in the presence of LC-14 at concentrations of 5, 10, and 20  $\mu\text{M}$ .

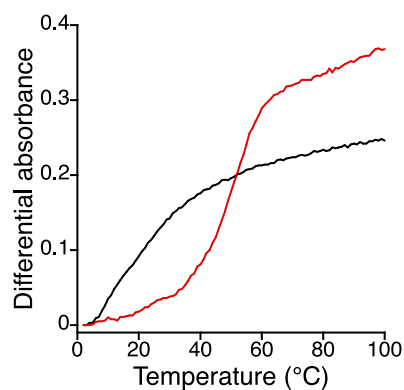

**Figure S7.** UV melting curves of r(UGGAA)<sub>9</sub> in the absence (black) and presence of LC-14 (red). RNA and ligand concentrations were 2  $\mu$ M and 40  $\mu$ M, respectively.

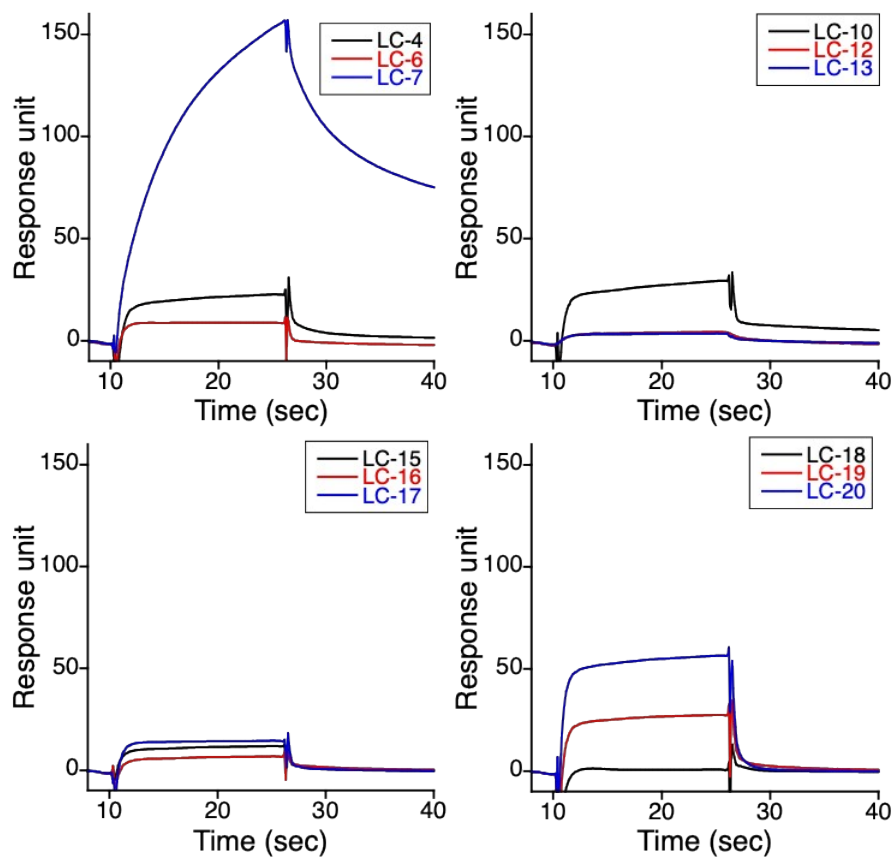

**Figure S8.** SPR analysis of the binding of non-hit compounds to r(UGGAA)<sub>9</sub>-immobilized surface. Compound concentration was 10  $\mu$ M. The amount of 5'-biotin-labelled r(UGGAA)<sub>9</sub> immobilized on the SA sensor chip was 476 RU.

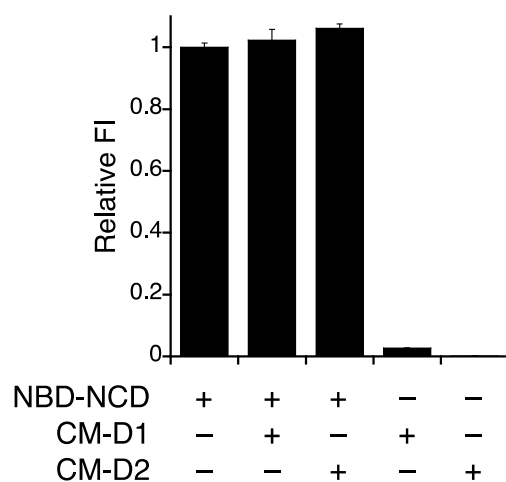

**Figure S9.** Relative fluorescence intensity (FI) of 1  $\mu\text{M}$  NBD-NCD in the absence and presence of 10  $\mu\text{M}$  CM-D1 or CM-D2. The FI of each sample was measured with 510 nm excitation and 560 nm emission.

**Discussion:** CM-D1 and DM-D2 did not significantly affect the fluorescence of NBD-NCD. This result suggested that the fluorescence of CM-D1 and CM-D2 do not interfere with the FID assay using NBD-NCD.

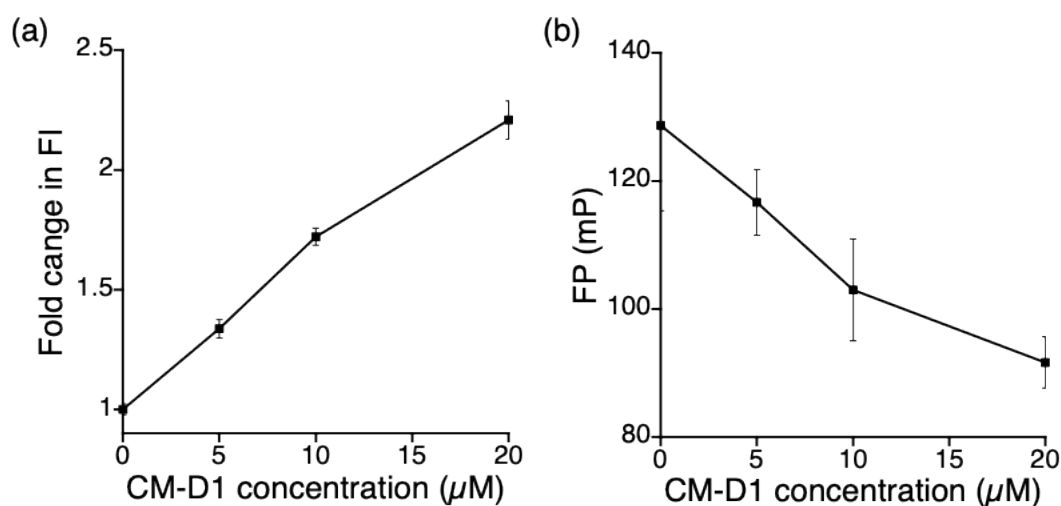

**Figure S10.** Plots of CM-D1 concentration versus (a) fold change in FI and (b) FP of 1  $\mu\text{M}$  NBD-NCD with 200 nM r(UGGAA)<sub>9</sub> in the presence of CM-D1 at concentrations of 5, 10, and 20  $\mu\text{M}$ .

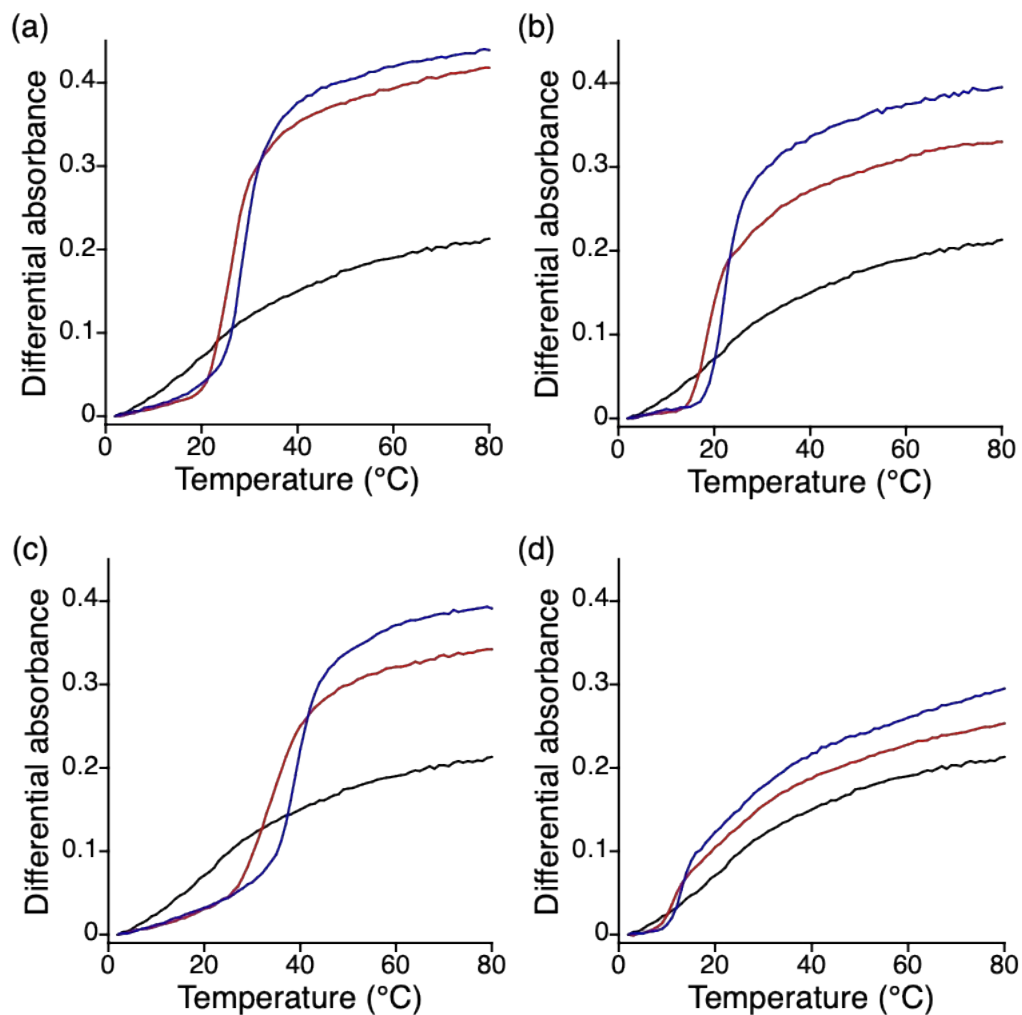

**Figure S11.** UV melting curves of r(UGGAA)<sub>9</sub> in the absence (black) and presence of (a) SMN-C5, (b) risdiplam, (c) CM-D1, or (d) CM-D2. RNA and ligand concentrations were 2  $\mu$ M and 20 (red) or 40  $\mu$ M (blue), respectively.

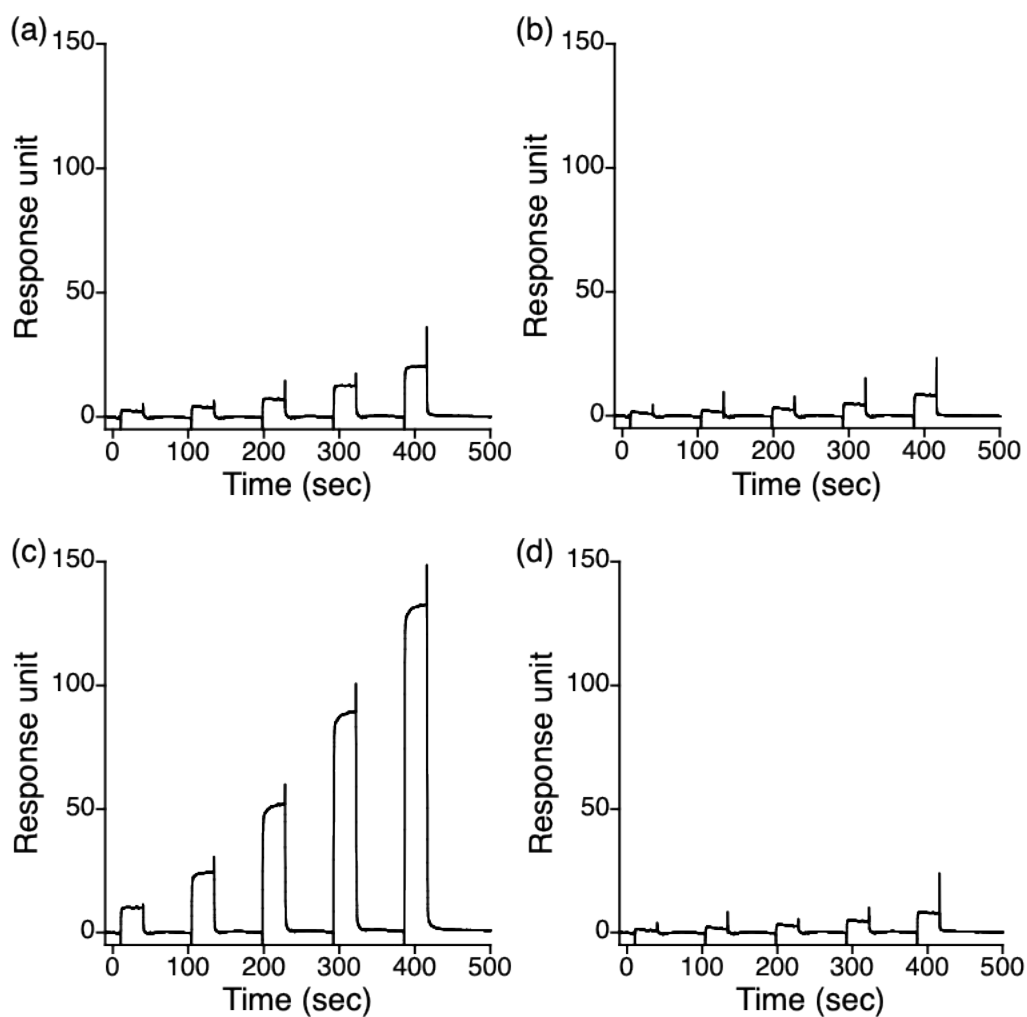

**Figure S12.** SPR analysis of the binding of (a) SMN-C5, (b) risdiplam, (c) CM-D1, and (d) CM-D2 to r(UGGAA)<sub>9</sub>. The ligand was sequentially added at 1.25, 2.5, 5, 10, and 20  $\mu$ M.

<sup>1</sup>H NMR of NBD-NCD

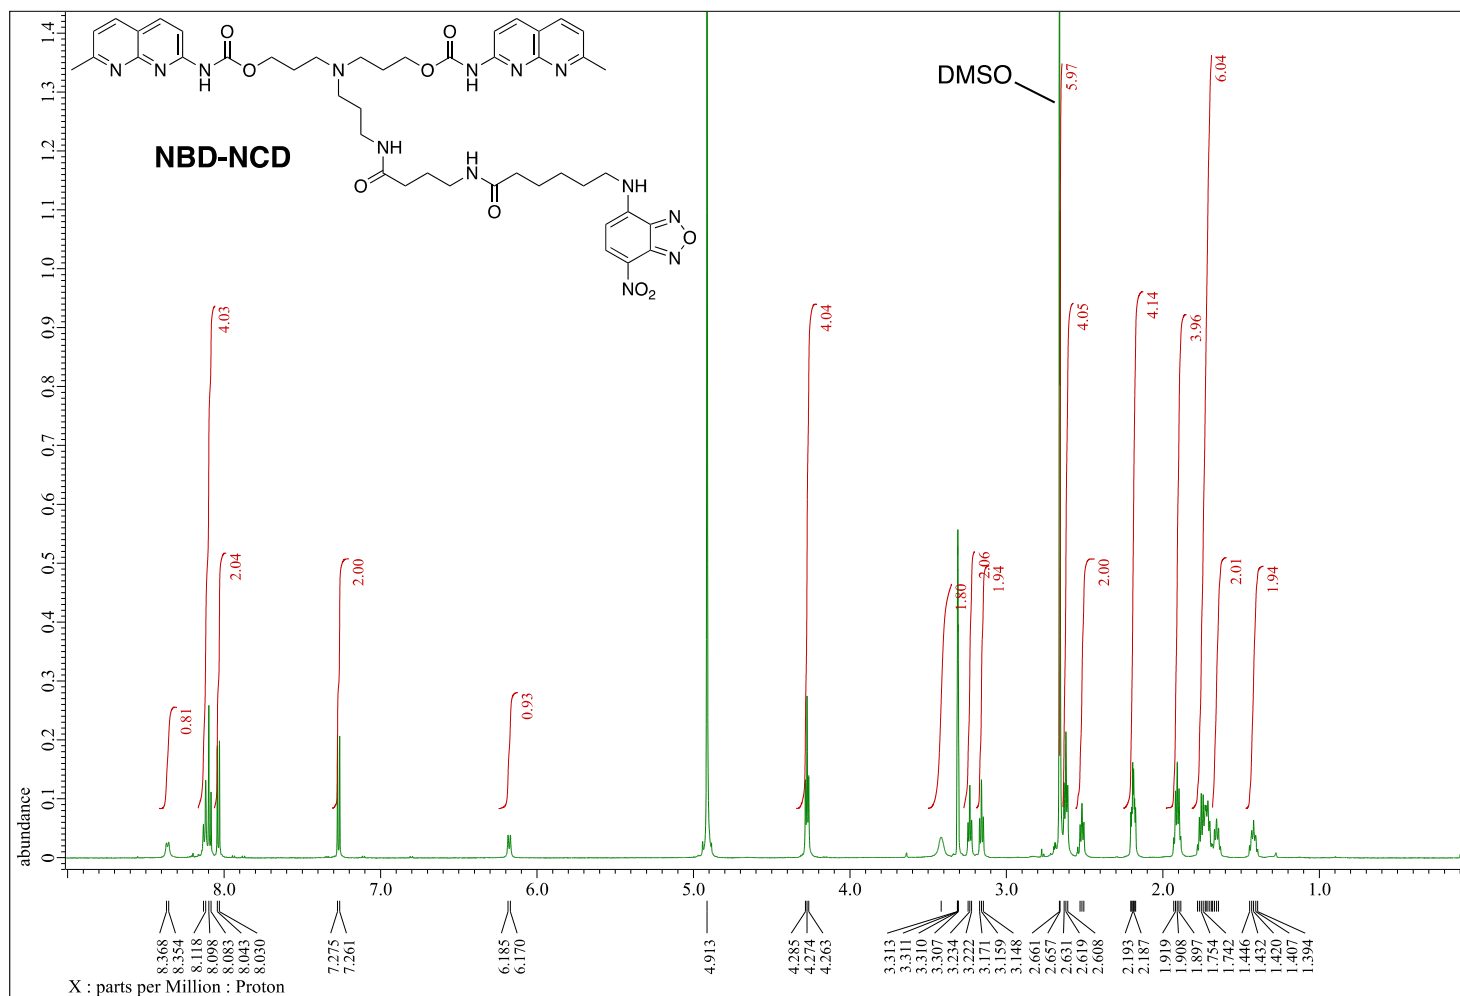

<sup>13</sup>C NMR of NBD-NCD

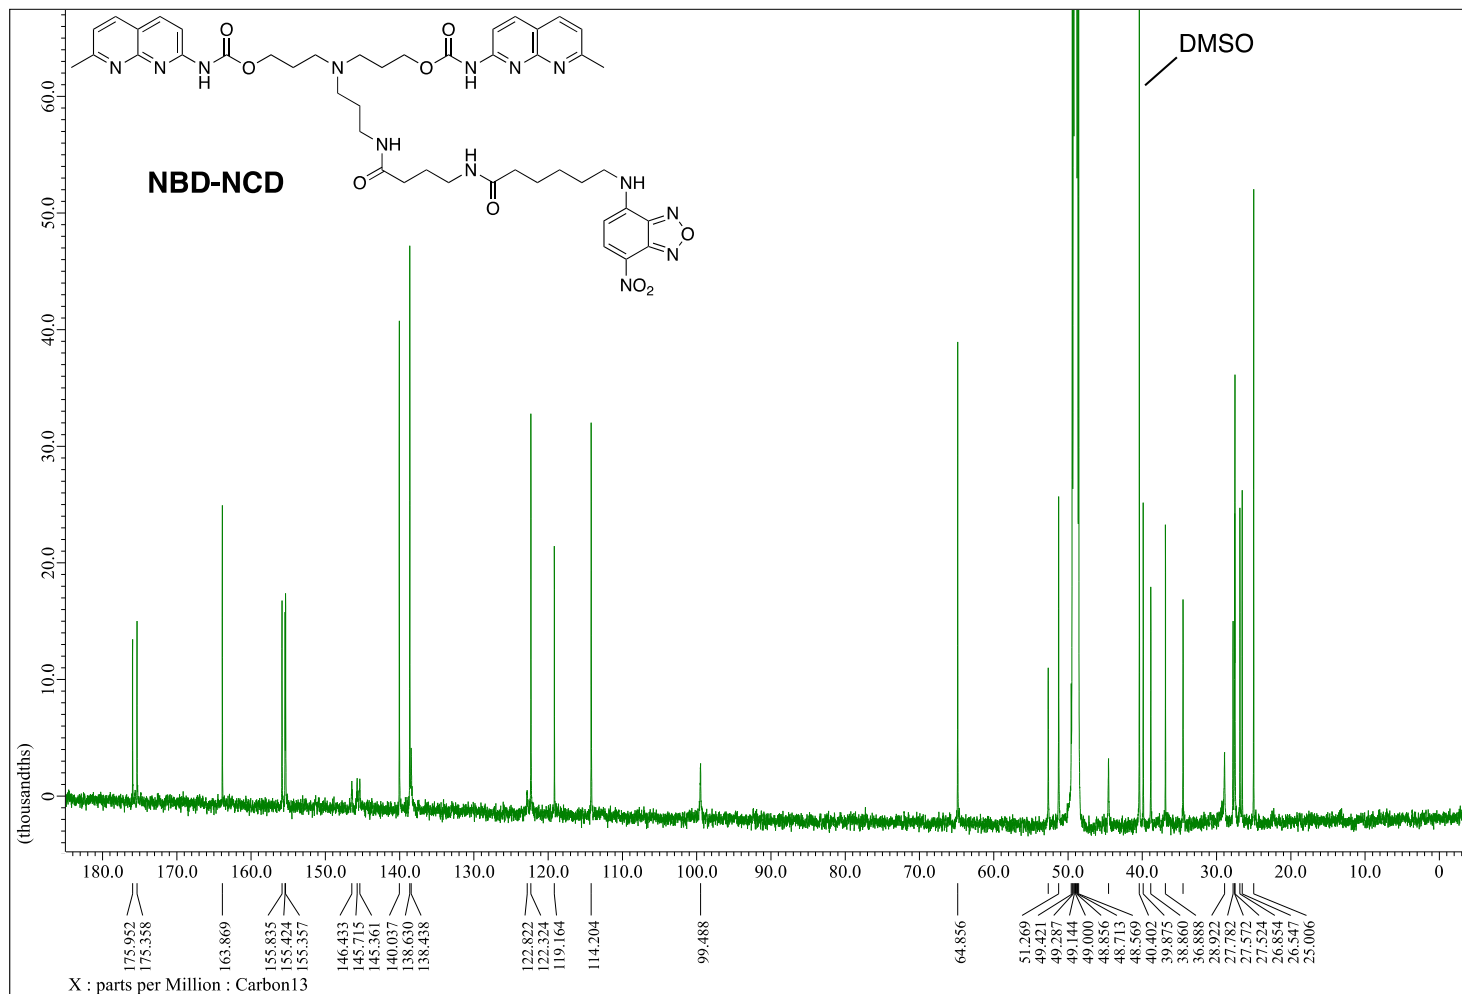

Supplement: d3cc00837a1.pdf [file d3cc00837a1.pdf]
